# Supplementary material for: Validation and clinical discovery demonstration of a real-world data extraction platform
Source: bioRxiv or medRxiv preprint supplement (doi:10.1101/2023.02.21.23286092), 2023-02-26
Supplement: Supplementary file [file media-2.pdf]

**Medical Records**  
from **n=50** metastatic breast  
cancer patients participating  
in health data platform

**Manual Medical Record  
Review CRF**  
Annotators fill out CRF using  
original medical records

| Patients | Manual CRF  | Platform-Data CRF |
|----------|-------------|-------------------|
| 1–12     | Annotator 1 | Annotator 2       |
| 13–25    | Annotator 2 | Annotator 1       |
| 26–37    | Annotator 3 | Annotator 4       |
| 38–50    | Annotator 4 | Annotator 3       |

**Platform-extracted data**  
Structured data extracted by  
health data platform

**Platform-Data CRF**  
Annotators fill out CRF  
using structured data  
output of platform

**Compare**  
Manual Data CRFs to  
Platform-Data CRF
